# Supplementary material for: Obesity Prevalence and Associated Socio-Demographic Characteristics and Health Behaviors in Russia and Norway
Source: MDPI journal article supplement (doi:10.3390/ijerph19159428), 2022-08-01
Supplement: s1 [file s1]

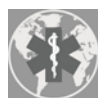

## SUPPLEMENTARY DATA

**Table S1. Prevalence of general obesity (BMI $\geq$ 30 kg/m<sup>2</sup>) by study, sex, and age.**

| Age, years   | Men              |                      | Women            |                      |
|--------------|------------------|----------------------|------------------|----------------------|
|              | KYH†<br>(N=1732) | Tromsø7‡<br>(N=9300) | KYH†<br>(N=2389) | Tromsø7‡<br>(N=8346) |
|              | Percent (95% CI) |                      | Percent (95% CI) |                      |
| 40-44        | 23.1 (18.1-29.1) | 26.4 (24.2-28.7)     | 22.6 (18.5-27.3) | 21.2 (19.3-23.2)     |
| 45-49        | 26.8 (21.7-32.6) | 27.5 (25.3-29.7)     | 27.2 (22.8-32.1) | 24.9 (22.9-27.0)     |
| 50-54        | 26.0 (21.2-31.5) | 25.5 (23.4-27.9)     | 34.4 (29.8-39.3) | 20.9 (19.1-22.9)     |
| 55-59        | 28.6 (23.7-34.1) | 24.9 (22.7-27.3)     | 43.9 (39.2-48.8) | 21.3 (19.4-23.5)     |
| 60-64        | 27.2 (22.7-32.1) | 25.3 (23.0-27.7)     | 48.6 (43.8-53.4) | 21.4 (19.3-23.6)     |
| 65-69        | 29.0 (24.4-34.1) | 24.0 (21.7-26.6)     | 48.2 (43.7-52.7) | 22.5 (20.2-24.9)     |
| <b>Total</b> | 27.0 (25.0-29.1) | 25.7 (24.8-26.7)     | 38.5 (36.6-40.5) | 22.0 (21.2-22.9)     |

BMI – body mass index. †Missing data in KYH: weight – 13 (0.3%), height – 7 (0.17%). ‡Missing data in Tromsø7: weight – 40 (0.2%), height – 39 (0.2%).

**Table S2. Distribution of BMI categories according to age and study in women.**

| Age, years       | Underweight,<br>BMI<18.5 | Normal weight,<br>BMI 18.5-24.9 | Overweight,<br>BMI 25.0–29.9 | Obesity I,<br>BMI 30.0–34.9 | Obesity II,<br>BMI 35.0–39.9 | Obesity III, BMI<br>>=40.0 | Total             |
|------------------|--------------------------|---------------------------------|------------------------------|-----------------------------|------------------------------|----------------------------|-------------------|
| KYH, Abs (%)     |                          |                                 |                              |                             |                              |                            |                   |
| 40-44            | 12 (3)                   | 167 (48)                        | 92 (26)                      | 49 (14)                     | 19 (5)                       | 11 (3)                     | 350 (100)         |
| 45-49            | 5 (1)                    | 152 (44)                        | 97 (28)                      | 54 (15)                     | 26 (7)                       | 15 (4)                     | 349 (100)         |
| 50-54            | 4 (1)                    | 121 (32)                        | 123 (33)                     | 75 (20)                     | 35 (9)                       | 20 (5)                     | 378 (100)         |
| 55-59            | 3 (1)                    | 92 (22)                         | 135 (33)                     | 113 (28)                    | 43 (10)                      | 24 (6)                     | 410 (100)         |
| 60-64            | 1 (0)                    | 67 (16)                         | 149 (35)                     | 121 (29)                    | 56 (13)                      | 28 (7)                     | 422 (100)         |
| 65-69            | 2 (0)                    | 65 (14)                         | 177 (38)                     | 150 (32)                    | 50 (11)                      | 27 (6)                     | 471 (100)         |
| <b>Total</b>     | <b>27 (1)</b>            | <b>664 (28)</b>                 | <b>773 (32)</b>              | <b>562 (24)</b>             | <b>229 (10)</b>              | <b>125 (5)</b>             | <b>2380 (100)</b> |
| Tromsø7, Abs (%) |                          |                                 |                              |                             |                              |                            |                   |
| 40-44            | 15 (1)                   | 744 (44)                        | 561 (34)                     | 244 (15)                    | 74 (4)                       | 37 (2)                     | 1675 (100)        |
| 45-49            | 11 (1)                   | 726 (43)                        | 538 (32)                     | 277 (16)                    | 107 (6)                      | 38 (2)                     | 1697 (100)        |
| 50-54            | 14 (1)                   | 740 (44)                        | 591 (35)                     | 246 (14)                    | 80 (5)                       | 30 (2)                     | 1701 (100)        |
| 55-59            | 10 (1)                   | 594 (39)                        | 606 (39)                     | 228 (15)                    | 78 (5)                       | 22 (1)                     | 1538 (100)        |
| 60-64            | 10 (1)                   | 540 (38)                        | 562 (40)                     | 227 (16)                    | 54 (4)                       | 21 (1)                     | 1414 (100)        |

|              |               |                  |                  |                  |                |                |                   |
|--------------|---------------|------------------|------------------|------------------|----------------|----------------|-------------------|
| 65-69        | 14 (1)        | 449 (36)         | 507 (41)         | 217 (17)         | 46 (4)         | 18 (1)         | 1251 (100)        |
| <b>Total</b> | <b>74 (1)</b> | <b>3793 (41)</b> | <b>3365 (36)</b> | <b>1439 (16)</b> | <b>439 (5)</b> | <b>166 (2)</b> | <b>9276 (100)</b> |

Abs – absolute number of participants with corresponding characteristic. BMI – body mass index

**Table S3. Distribution of BMI categories according to age and study in men.**

| Age, years              | Underweight, BMI<18.5 | Normal weight, BMI 18.5-24.9 | Overweight, BMI 25.0–29.9 | Obesity I, BMI 30.0–34.9 | Obesity II, BMI 35.0–39.9 | Obesity III, BMI =>40.0 | Total             |
|-------------------------|-----------------------|------------------------------|---------------------------|--------------------------|---------------------------|-------------------------|-------------------|
| <b>KYH, Abs (%)</b>     |                       |                              |                           |                          |                           |                         |                   |
| 40-44                   | 3 (1)                 | 66 (29)                      | 104 (46)                  | 39 (17)                  | 10 (4)                    | 3 (1)                   | 225 (100)         |
| 45-49                   | 2 (1)                 | 81 (32)                      | 103 (41)                  | 51 (20)                  | 14 (6)                    | 3 (1)                   | 254 (100)         |
| 50-54                   | 3 (1)                 | 80 (29)                      | 122 (44)                  | 55 (20)                  | 12 (4)                    | 5 (2)                   | 277 (100)         |
| 55-59                   | 3 (1)                 | 74 (26)                      | 130 (45)                  | 63 (22)                  | 13 (4)                    | 7 (2)                   | 290 (100)         |
| 60-64                   | 3 (1)                 | 89 (26)                      | 160 (46)                  | 76 (22)                  | 15 (4)                    | 3 (1)                   | 346 (100)         |
| 65-69                   | 4 (1)                 | 89 (27)                      | 144 (43)                  | 71 (21)                  | 20 (6)                    | 6 (2)                   | 334 (100)         |
| <b>Total</b>            | <b>18 (1)</b>         | <b>479 (28)</b>              | <b>763 (44)</b>           | <b>355 (21)</b>          | <b>84 (5)</b>             | <b>27 (2)</b>           | <b>1726 (100)</b> |
| <b>Tromsø7, Abs (%)</b> |                       |                              |                           |                          |                           |                         |                   |
| 40-44                   | 2 (0)                 | 339 (23)                     | 742 (50)                  | 293 (20)                 | 75 (5)                    | 20 (1)                  | 1471 (100)        |
| 45-49                   | 2 (0)                 | 354 (22)                     | 788 (50)                  | 331 (21)                 | 81 (5)                    | 21 (1)                  | 1577 (100)        |
| 50-54                   | 2 (0)                 | 336 (23)                     | 729 (51)                  | 276 (19)                 | 68 (5)                    | 22 (2)                  | 1433 (100)        |
| 55-59                   | 3 (0)                 | 304 (22)                     | 710 (52)                  | 279 (21)                 | 49 (4)                    | 10 (1)                  | 1355 (100)        |
| 60-64                   | 3 (0)                 | 334 (25)                     | 649 (49)                  | 269 (20)                 | 52 (4)                    | 12 (1)                  | 1319 (100)        |
| 65-69                   | 2 (0)                 | 272 (23)                     | 617 (53)                  | 236 (20)                 | 39 (3)                    | 7 (1)                   | 1173 (100)        |
| <b>Total</b>            | <b>14 (0)</b>         | <b>1939 (23)</b>             | <b>4235 (51)</b>          | <b>1684 (20)</b>         | <b>364 (4)</b>            | <b>92 (1)</b>           | <b>8328 (100)</b> |

Abs – absolute number of participants with corresponding characteristic. BMI – body mass index

**Table S4. Prevalence of abdominal obesity (WHR>0.9 for men and>0.85 for women) by study, sex and age.**

| Age, years | Men              |                      | Women            |                      |
|------------|------------------|----------------------|------------------|----------------------|
|            | KYH†<br>(N=1732) | Tromsø7‡<br>(N=8346) | KYH†<br>(N=2389) | Tromsø7‡<br>(N=9300) |
|            | Percent (95% CI) |                      | Percent (95% CI) |                      |
| 40-44      | 69.3 (63.0-75.0) | 53.6 (51.0-56.1)     | 25.9 (21.6-30.8) | 11.5 (10.0-13.1)     |
| 45-49      | 66.1 (60.1-71.7) | 65.1 (62.7-67.4)     | 26.9 (22.5-31.8) | 14.3 (12.7-16.1)     |
| 50-54      | 75.3 (69.9-80.0) | 70.9 (68.5-73.2)     | 41.3 (36.5-46.3) | 14.9 (13.3-16.7)     |
| 55-59      | 78.3 (73.2-82.7) | 78.8 (76.5-80.9)     | 54.0 (49.2-58.8) | 21.5 (19.5-23.6)     |

|              |                  |                  |                  |                  |
|--------------|------------------|------------------|------------------|------------------|
| 60-64        | 79.5 (74.9-83.4) | 82.2 (80.0-84.2) | 58.6 (53.9-63.2) | 23.2 (21.1-25.5) |
| 65-69        | 83.3 (78.9-86.9) | 87.9 (85.9-89.7) | 65.5 (61.1-69.7) | 28.0 (25.6-30.5) |
| <b>Total</b> | 76.1 (74.0-78.0) | 72.2 (71.2-73.2) | 47.0 (45.0-49.0) | 18.3 (17.5-19.1) |

†Missing data in KYH: waist circumference – 5 (0.1%), hip circumference – 5 (0.1%). ‡Missing data in Tromsø7: waist circumference – 77 (0.4%), hip circumference – 72 (0.4%).

**Table S5. Cross-tabulation of general obesity (BMI $\geq$ 30 kg/m<sup>2</sup>) and abdominal obesity (WHR $>$ 0.9 for men and $>$ 0.85 for women) for men and women in Tromsø7 and in KYH.**

| General obesity | Abdominal obesity, Abs (%) |             | Total |
|-----------------|----------------------------|-------------|-------|
|                 | Yes                        | No          |       |
| KYH, men        |                            |             |       |
| Yes             | 458 (98.3)                 | 8 (1.7)     | 466   |
| No              | 854 (67.8)                 | 406 (32.2)  | 1260  |
| Tromsø7, men    |                            |             |       |
| Yes             | 2053 (96.2)                | 82 (3.8)    | 2135  |
| No              | 3942 (63.9)                | 2224 (36.1) | 6166  |
| KYH, women      |                            |             |       |
| Yes             | 665 (72.6)                 | 251 (27.4)  | 916   |
| No              | 453 (30.9)                 | 1011 (69.1) | 1464  |
| Tromsø7, women  |                            |             |       |
| Yes             | 812 (39.9)                 | 1122 (60.1) | 2034  |
| No              | 877 (12.2)                 | 6332 (87.8) | 7209  |

Abs – absolute number of participants with corresponding characteristic

**Table S6. Proportions of participants with overweight (BMI 25.0-29.9 kg/m<sup>2</sup>) among men and women in Tromsø7 and in KYH with abdominal obesity (WHR $>$ 0.9 for men and $>$ 0.85 for women) but without general obesity (BMI $\geq$ 30 kg/m<sup>2</sup>).**

|                | Number of participants with AO<br>but without GO | Overweight, Abs (%) |
|----------------|--------------------------------------------------|---------------------|
|                | N                                                | Abs (%)             |
| <b>KYH</b>     |                                                  |                     |
| Men            | 854                                              | 653 (76.5)          |
| Women          | 453                                              | 361 (79.7)          |
| <b>Tromsø7</b> |                                                  |                     |
| Men            | 3942                                             | 3200 (81.2)         |
| Women          | 877                                              | 663 (75.6)          |

Abs – absolute number of participants with corresponding characteristic
